# Supplementary material for: Familial dysalbuminaemic hyperthyroxinaemia interferes with current free thyroid hormone immunoassay methods
Source: PubMed Central journal article supplement (PMC7222281; doi:10.1530/eje-19-1021), 2020-03-26

**A**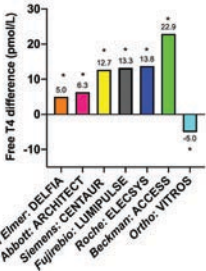**B**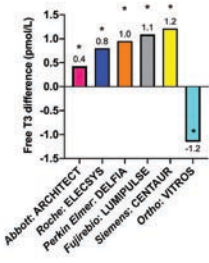

Supplement: supplementary_figure_1.pdf [file supplementary_figure_1.pdf]
